# Supplementary material
Source: MDPI journal article supplement (https://www.mdpi.com/2313-0105/9/6/304)
Supplement: s1 [file s1]

# Acrylate copolymer-reinforced hydrogel electrolyte for strain sensors and flexible supercapacitors

Ruixue Liu<sup>1</sup>, Wenkang Liu<sup>1</sup>, Jichao Chen<sup>1</sup>, Xiangli Bian<sup>2\*</sup>, Kaiqi Fan<sup>1</sup>, Junhong Zhao<sup>1</sup>, Xiaojing Zhang<sup>1\*</sup>

<sup>1</sup> College of Materials and Chemical Engineering, Zhengzhou University of Light Industry, Zhengzhou 450002, China

<sup>2</sup> Puyang City Water Supply Co., Lt, Puyang 457000, China

\* Correspondence: maying01@zybank.com.cn (X.B.); zhangxj@iccas.ac.cn (X.Z.)

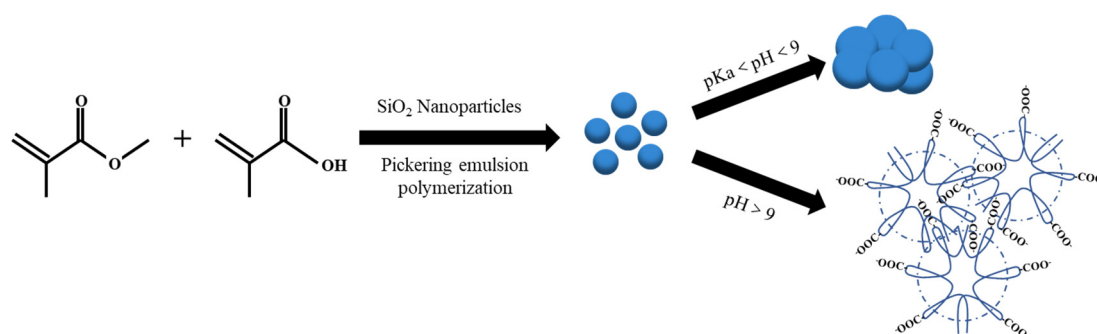

**Figure S1.** Schematic diagram of the preparation process, swelling, disentanglement, and regrouping of P(MMA-MAA) latex particles under alkaline conditions.

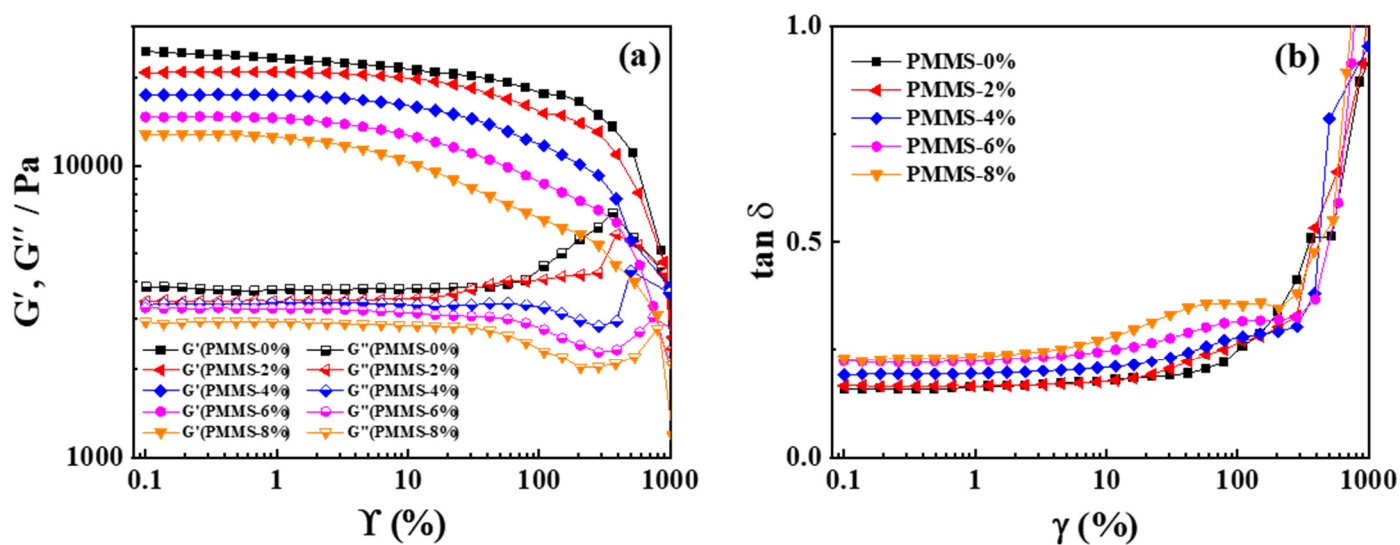

**Figure S2.** Rheological properties of P(AAS-VPA)/PMMS composite hydrogels: (a–b) curves of rheological properties of the P(AAS-VPA)/PMMS composite hydrogel with different PMMS contents.

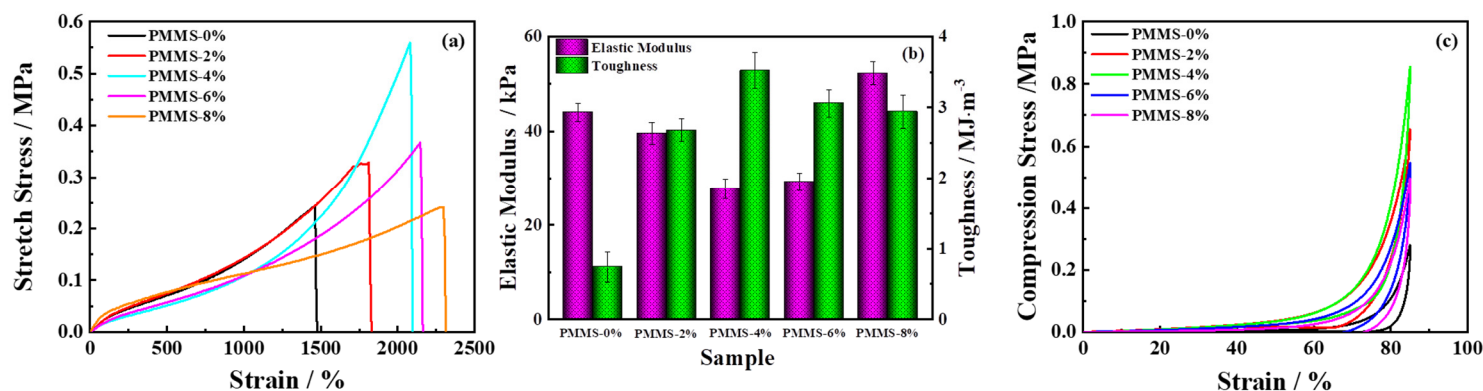

**Figure S3.** Effect of PMMS and VPA contents on the properties of the P(AAS-VPA)/PMMS composite hydrogels: (a–c) tensile stress–strain curves, corresponding elastic modulus, and toughness and compressive stress–strain curves with PMMS content in hydrogels.

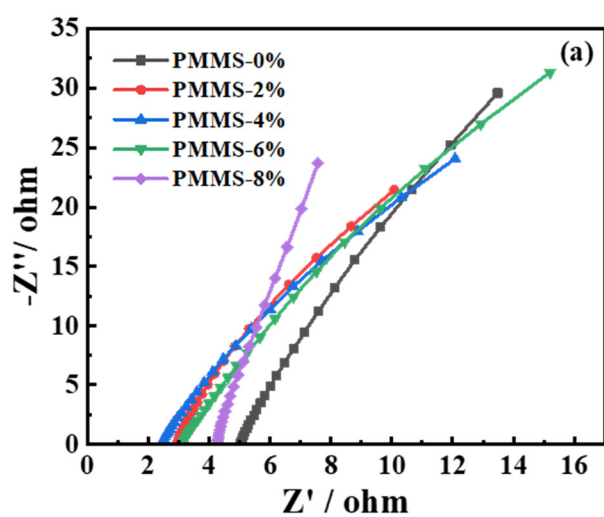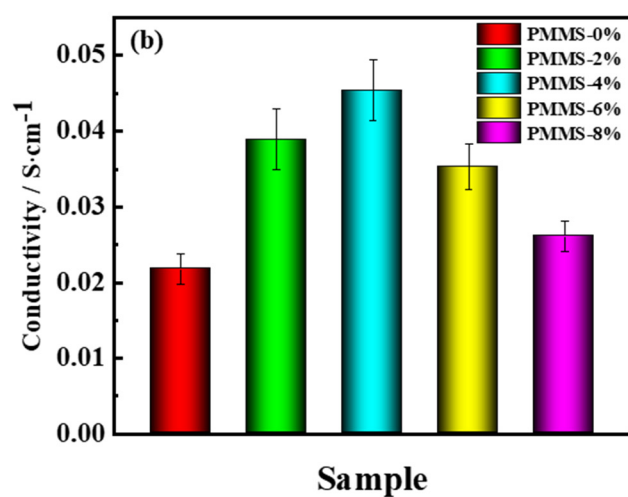

**Figure S4.** (a) EIS versus frequency for hydrogels with different PMMS contents varying between  $10^5$  Hz and  $10^{-2}$  Hz and (b) effect of PMMS on the ionic conductivity of composite hydrogels.

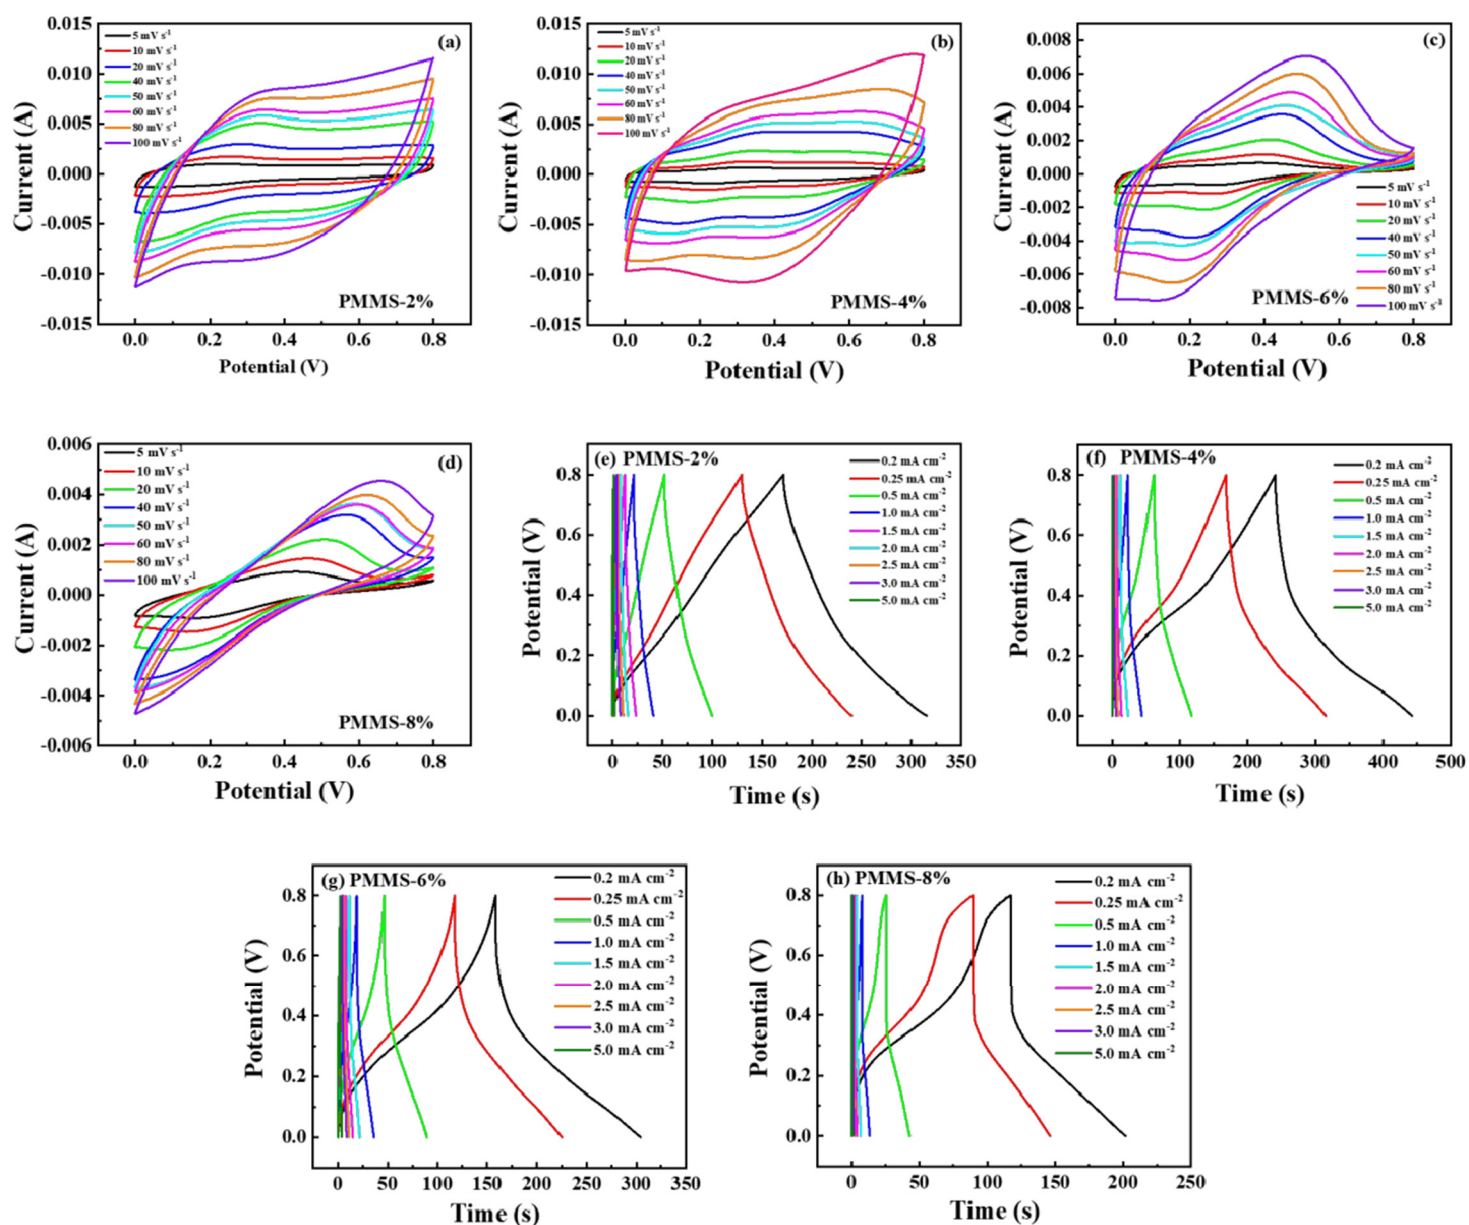

**Figure S5.** Capacitive performance of the P(AAS-VPA)/PMMS composite hydrogel at different PMMS contents: (a–d) CV curves of hydrogel electrolyte at scanning rates of 5~100 mV/s; (e–h) GCD curves of hydrogel electrolyte at current densities of 0.2~5.0 mA/cm<sup>2</sup>.

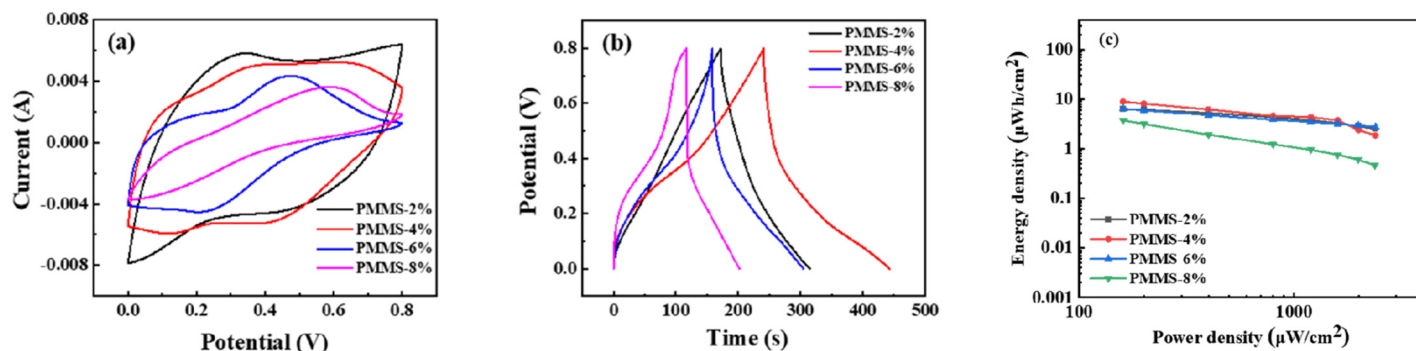

**Figure S6.** (a, b) CV curves of P(AAS-VPA)/PMMS composite hydrogel electrolyte at 50 mV/s scan rate and GCD curves at a current density of 0.2 mA/cm<sup>2</sup> for different PMMS mass fractions, respectively; (c) the Ragone diagram of PMMS content in the composite hydrogel with 2%, 4%, 6%, and 8%, respectively.

**Table S1.** Comparison of the sensing performance of different hydrogels

| Hydrogel                                  | Strain | GF    | Ref       |
|-------------------------------------------|--------|-------|-----------|
| P(AAS-VPA)/PMMS                           | 300%   | 4     | This work |
| P (THAM/AM)                               | 200%   | 3.69  | 1         |
| PVA/SNF/CN                                | 100%   | 0.7   | 2         |
| PVA/CA/AgNPs                              | 200%   | 1.6   | 3         |
| SBMA-co-HEMA                              | 100%   | 1.8   | 4         |
| AMP-regulated hydrogels                   | 100%   | 2.37  | 5         |
| Poly (vinyl alcohol)/glycerol/polyaniline | 100%   | 2.14  | 6         |
| PAAm/PAA-Fe <sup>3+</sup> /NaCl           | 500%   | 1.96  | 7         |
| PAA/PVA/EG/PEDOT: PSS/F-MWCNT             | 100%   | 1.61  | 8         |
| PVA/P(SBMA-co-HEMA)                       | 300%   | 3.356 | 9         |
| PVA/CNFs/ $\alpha$ -ZrP-Na <sup>+</sup>   | 350%   | 2.46  | 10        |

## References

- (1) Shan, C.; Che, M.; Cholewinski, A.; Ki Kunihiro, J.; Yim, E. K. F.; Su, R.; Zhao, B. Adhesive Hydrogels Tailored with Cellulose Nanofibers and Ferric Ions for Highly Sensitive Strain Sensors. *Chemical Engineering Journal* **2022**, 450, 138256.
- (2) Bao, S.; Gao, J.; Xu, T.; Li, N.; Chen, W.; Lu, W. Anti-Freezing and Antibacterial Conductive Organohydrogel Co-Reinforced by 1d Silk Nanofibers and 2d Graphitic Carbon Nitride Nanosheets as Flexible Sensor. *Chemical Engineering Journal* **2021**, 411, 128470.
- (3) Chen, L.; Chang, X.; Wang, H.; Chen, J.; Zhu, Y. Stretchable and Transparent Multimodal Electronic-Skin Sensors in Detecting Strain, Temperature, and Humidity. *Nano Energy* **2022**, 96, 107077.
- (4) Wang, L.; Gao, G.; Zhou, Y.; Xu, T.; Chen, J.; Wang, R.; Zhang, R.; Fu, J. Tough, Adhesive, Self-Healable, and Transparent Ionically Conductive Zwitterionic Nanocomposite

Hydrogels as Skin Strain Sensors. *ACS Appl Mater Interfaces* **2019**, *11* (3), 3506-3515.

- (5) Zhang, Q.; Liu, X.; Ren, X.; Jia, F.; Duan, L.; Gao, G. Nucleotide-Regulated Tough and Rapidly Self-Recoverable Hydrogels for Highly Sensitive and Durable Pressure and Strain Sensors. *Chemistry of Materials* **2019**, *31* (15), 5881-5889.
- (6) Hu, C.; Zhang, Y.; Wang, X.; Xing, L.; Shi, L.; Ran, R. Stable, Strain-Sensitive Conductive Hydrogel with Antifreezing Capability, Remoldability, and Reusability. *ACS Appl Mater Interfaces* **2018**, *10* (50), 44000-44010.
- (7) Li, S.; Pan, H.; Wang, Y.; Sun, J. Polyelectrolyte Complex-Based Self-Healing, Fatigue-Resistant and Anti-Freezing Hydrogels as Highly Sensitive Ionic Skins. *Journal of Materials Chemistry A* **2020**, *8* (7), 3667-3675.
- (8) Ge, G.; Yuan, W.; Zhao, W.; Lu, Y.; Zhang, Y.; Wang, W.; Chen, P.; Huang, W.; Si, W.; Dong, X. Highly Stretchable and Autonomously Healable Epidermal Sensor Based on Multi-Functional Hydrogel Frameworks. *Journal of Materials Chemistry A* **2019**, *7* (11), 5949-5956.
- (9) Ren, J.; Liu, Y.; Wang, Z.; Chen, S.; Ma, Y.; Wei, H.; Lü, S. An Anti-Swellable Hydrogel Strain Sensor for Underwater Motion Detection. *Advanced Functional Materials* **2021**, *32* (13), 2107404.
- (10) Liu, X.; Qin, J.; Wang, J.; Chen, Y.; Miao, G.; Zheng, J.; Liu, X. Preparation and Properties of Cellulose Nanofibers/ A - Zirconium Phosphate Nanosheets Composite Polyvinyl Alcohol Ion-Conductive Organohydrogel and Its Application in Strain Sensors. *Journal of Applied Polymer Science* **2022**, *139* (44), e53076.
